# Supplementary material for: Predicting aquatic toxicities of benzene derivatives in multiple test species using local, global and interspecies QSTR modeling approaches
Source: Royal Society of Chemistry journal article supplement (doi:10.1039/c5ra12825k), 2015-01-01
Supplement: c5ra12825k1.pdf [file c5ra12825k1.pdf]

## Supplementary Material

### Predicting aquatic toxicities of benzene derivatives in multiple test species using local, global and interspecies QSTR modeling approaches

Shikha Gupta<sup>1</sup>, Nikita Basant<sup>2</sup>, Kunwar P. Singh\*<sup>1</sup>

<sup>1</sup>Environmental Chemistry Division,  
CSIR-Indian Institute of Toxicology Research,  
Post Box 80, Mahatma Gandhi Marg, Lucknow-226 001, India  
<sup>2</sup>ETRC, Gomti Nagar, Lucknow-226010, India

**\*Author for all correspondence**

**E-mail:** [kpsingh\\_52@yahoo.com](mailto:kpsingh_52@yahoo.com); [kunwarpsingh@gmail.com](mailto:kunwarpsingh@gmail.com)

**Table SI 1:** Structure influential chemicals and response outliers in L-QSTR models

| Structure Influential chemicals |                                                                                     | Response outliers  |                                                                                       |
|---------------------------------|-------------------------------------------------------------------------------------|--------------------|---------------------------------------------------------------------------------------|
| Chemical name                   | Chemical structure                                                                  | Chemical name      | Chemical structure                                                                    |
| <b>DTB L-QSTR model</b>         |                                                                                     |                    |                                                                                       |
| 3,4,5,6-Tetrabromo-o-cresol     | 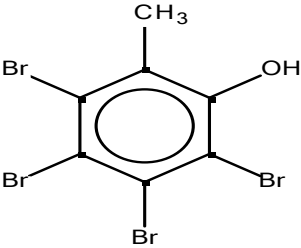 | 2,3-dinitrotoluene |  |
| Pentafluoroaniline              |  | 2,5-dinitrotoluene |  |
| Pentafluorophenol               |  |                    |                                                                                       |

---

Pentabromophenol

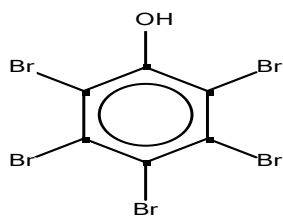

---

Pentafluorobenzaldehyde

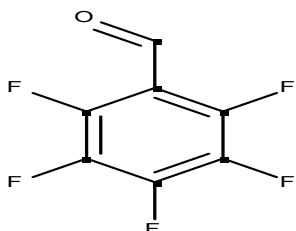

---

Pentafluoronitrobenzene

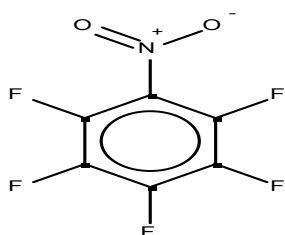

---

Benzyl-4-hydroxyphenyl ketone

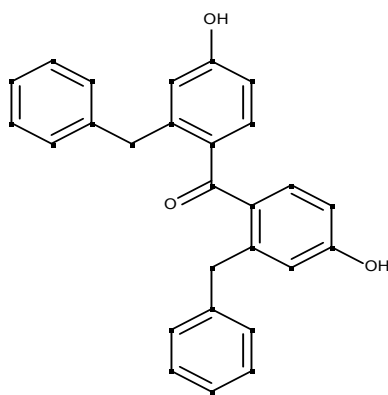

---

2,5-Diphenyl-1,4-benzoquinone

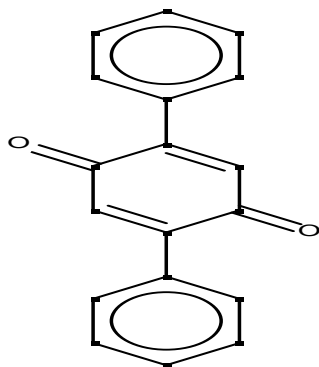

Pentafluorobenzyl alcohol

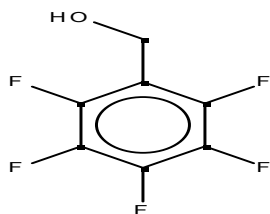

2,6-Iodo-4-nitrophenol

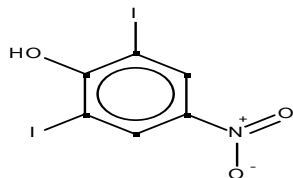

### SVM L-QSTR model

(±)-1,2-Diphenyl-2-propanol

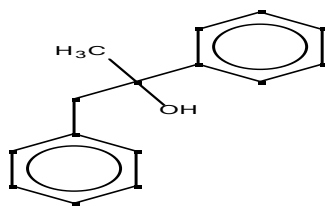

Pentafluorophenol

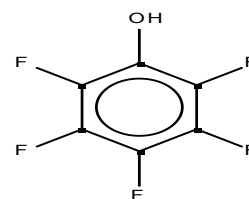

1,1-Diphenyl-2-propanol

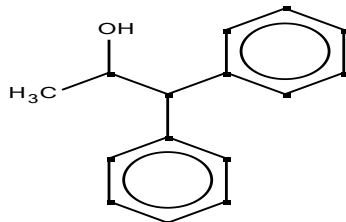

Phenyl isothiocyanate

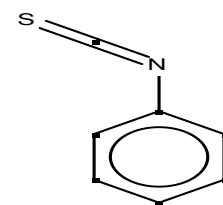

3,4,5,6-Tetrabromo-o-cresol

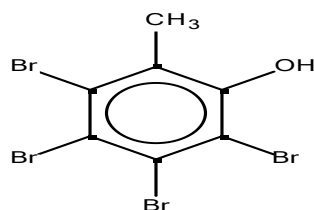

2-Nitrobenzamide

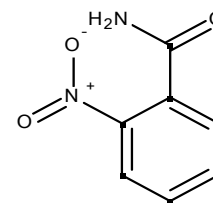

Pentafluoroaniline

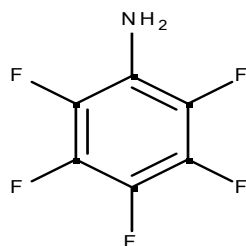

$\alpha,\alpha,\alpha,4$ -Tetrafluoro-o-toluidine

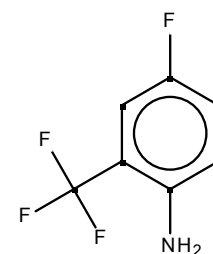

---

Pentafluorophenol

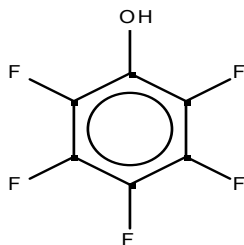

---

Pentabromophenol

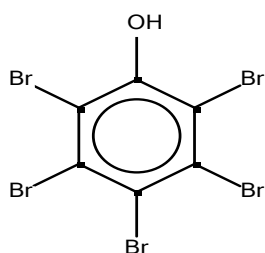

---

Pentafluoro  
benzaldehyde

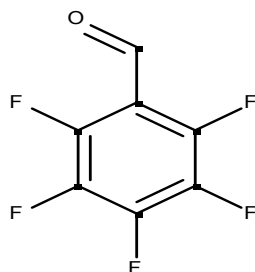

---

Pentafluoro  
nitrobenzene

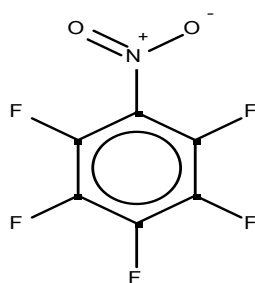

---

Benzhydrol

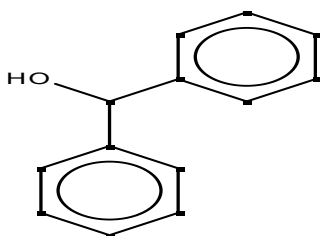

---

2,4,6-tris-  
(Dimethylaminomethyl)  
phenol

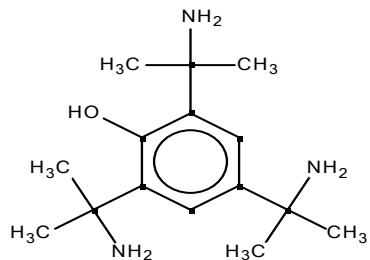

---

Benzyl-4-  
hydroxyphenyl ketone

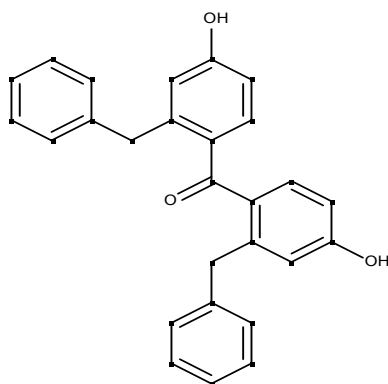

---

2,5-Diphenyl-1,4-  
benzoquinone

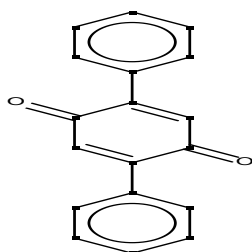

---

2-(Benzylthio)-3-  
nitropyridine

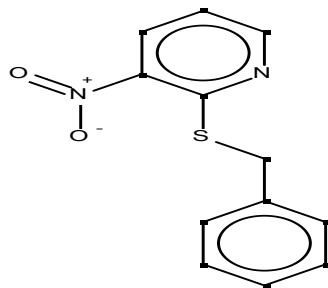

---

Pentafluorobenzyl  
alcohol

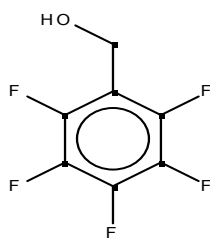

2,6-Iodo-4-nitrophenol

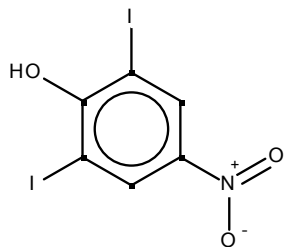**Table SI 2:** structure influential chemicals and response outliers in G-QSTR models

| Structure Influential chemicals |                    | Response outliers |                                 |
|---------------------------------|--------------------|-------------------|---------------------------------|
| Chemical name                   | Chemical structure | Chemical name     | Chemical structure              |
|                                 |                    | <b>S.no.</b>      |                                 |
| 3,4,5,6-Tetrabromo-o-cresol     |                    | <b>1</b>          | 1,3-dichlorobenzene<br>         |
| Pentauroaniline                 |                    | <b>2</b>          | 2,5-dinitrotoluene<br>          |
| Pentafluorophenol               |                    | <b>3</b>          | 2,6-dinitrotoluene<br>          |
| 2,6-Iodo-4-nitrophenol          |                    | <b>4</b>          | 2-methyl-3,6-dinitroaniline<br> |

Pentafluorobenzaldehyde

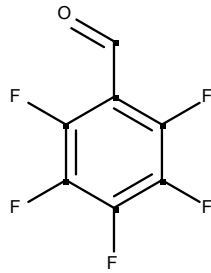

5 Pentafluorophenol

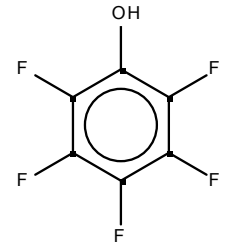

2,3,4,6-Tetrafluoronitrobenzene

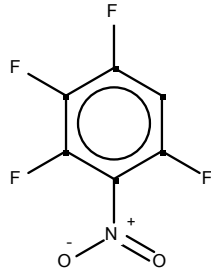

6 Phenyl isothiocyanate

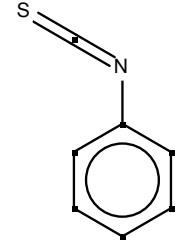

Pentafluoronitrobenzene

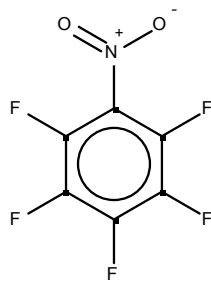

7 2-Nitrobenzamide

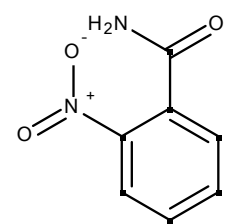

2,5-Diphenyl-1,4-benzoquinone

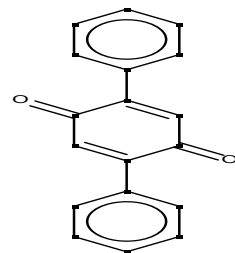

8 Dimethylnitroterephthalate

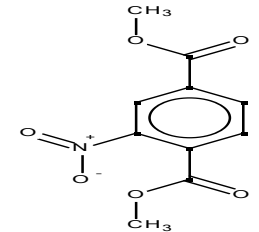

Pentafluorobenzyl alcohol

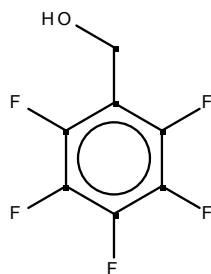

9 2,3,6-trinitrotoluene

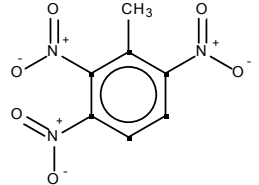

Pentabromophenol

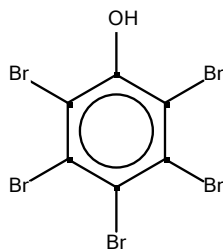

10 4-butylphenol

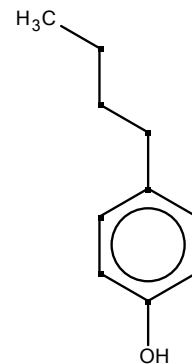

Benzyl-4-hydroxyphenyl ketone

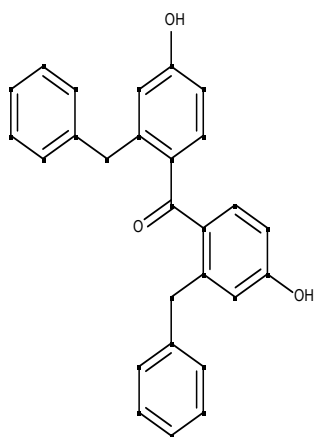

11 4-pentylphenol

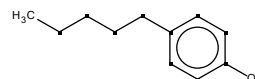

Response outlier no. 1-4 are present in DTB G-QSTR model; Response outlier no. 5-11 are present in SVM G-QSTR model

**Table SI 3:** structure influential chemicals in QAAR model for *P. reticulata*

**Chemical name**

**Chemical structure**

1,2,4,5-Tetrachlorobenzene

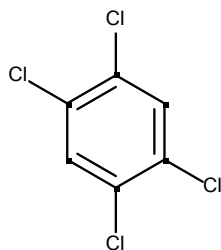



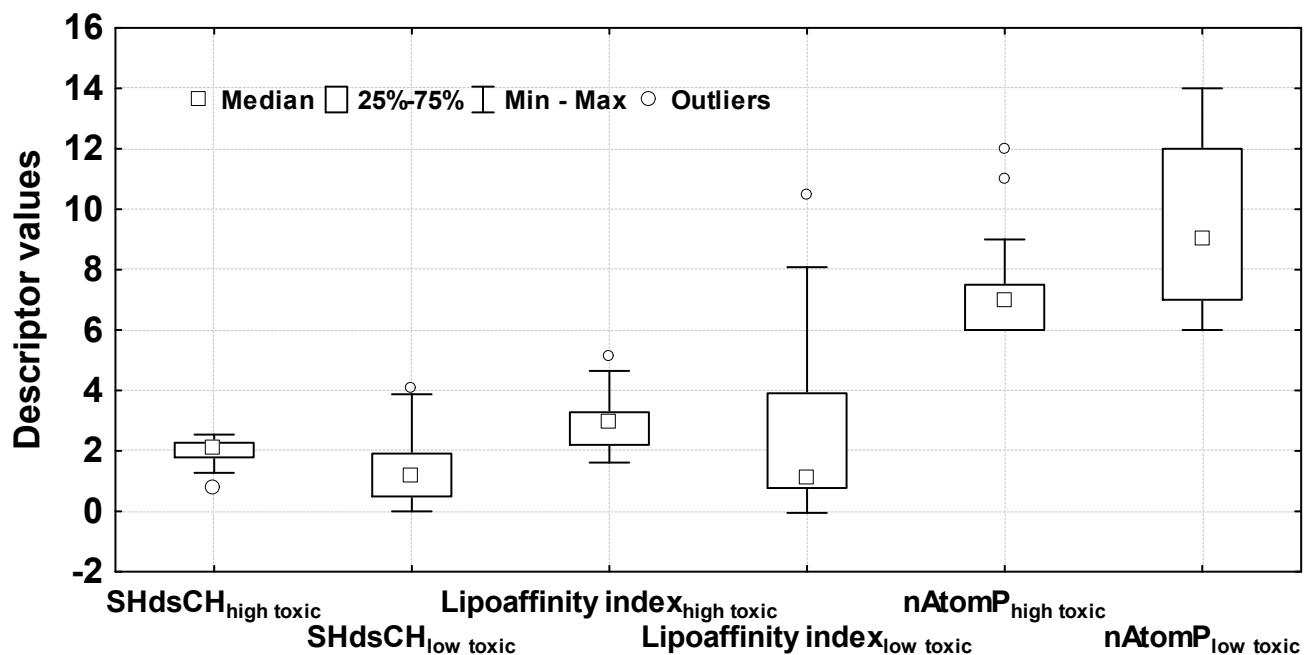

Figure SI 1a: Box- Whisker plot of the MDs (SHdsCH, Lipoaffinity index and nAtomP) in L-QSTR models

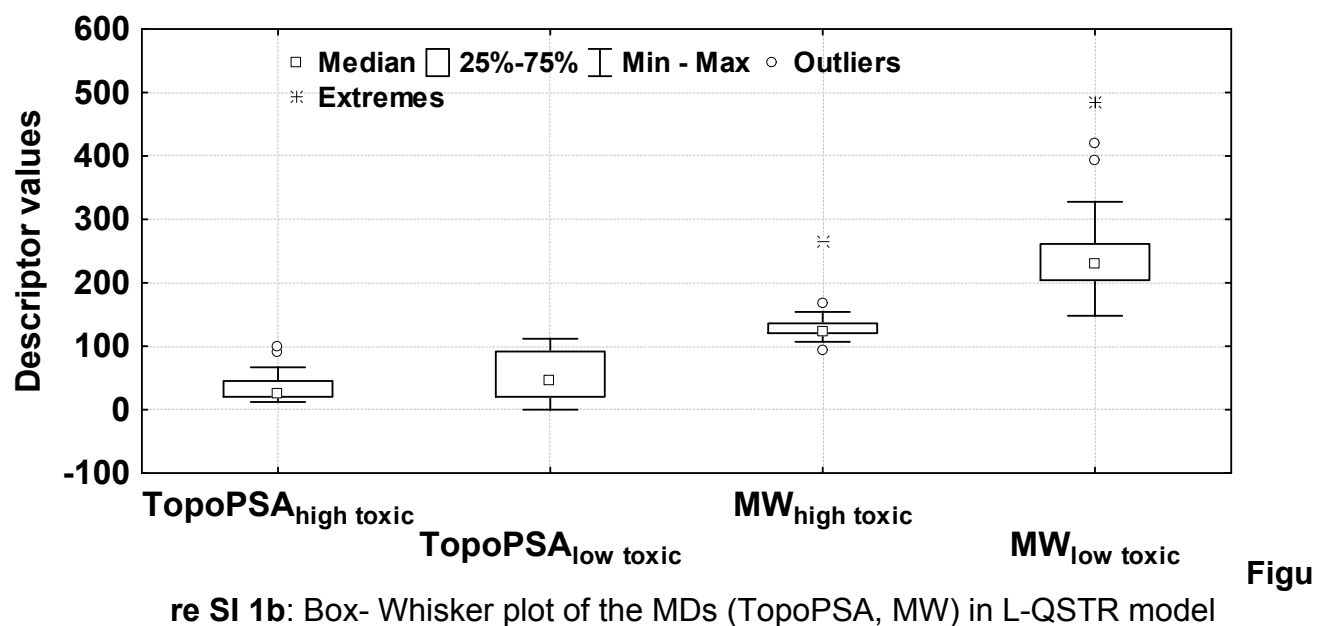

re SI 1b: Box- Whisker plot of the MDs (TopoPSA, MW) in L-QSTR model
